# Supplementary material for: Target highlights in CASP14: Analysis of models by structure providers
Source: PubMed Central journal article supplement (PMC8616854; doi:10.1002/prot.26247), 2021-10-10
Supplement: NIHMS1743318-supplement-supinfo.pdf [file NIHMS1743318-supplement-supinfo.pdf]

## **SUPPLEMENTARY INFORMATION**

### **Target highlights in CASP14: analysis of models by structure providers**

#### **Correspondence**

Leila Tamara Alexander, email: [leila.alexander@sib.swiss](mailto:leila.alexander@sib.swiss)

**TABLE S1.** CASP14 target providers

| #  | Contributor               | Country     | Institution                   | Target                     |
|----|---------------------------|-------------|-------------------------------|----------------------------|
| 1  | Athanassios Adamopoulos   | Netherlands | Cancer Institute              | T1068                      |
| 2  | Markus Alahuhta           | USA         | NREL                          | T1057                      |
| 3  | Ann M. Arvin              | USA         | Stanford U                    | H1036 and T1036            |
| 4  | Yannick J. Bomble         | USA         | NREL                          | T1057                      |
| 5  | Bettina Böttcher          | Germany     | Julius-Maximilians U Würzburg | T1099                      |
| 6  | Cécile Breyton            | France      | IBS, Grenoble                 | H1060 and T1061            |
| 7  | Naga Babu Chinnam         | USA         | U of Texas                    | T1101                      |
| 8  | Wah Chiu                  | USA         | Stanford U                    | H1036 and T1036            |
| 9  | Rhys Grinter              | Australia   | Monash U                      | T1054                      |
| 10 | Gagan D. Gupta            | India       | BARC                          | T1078                      |
| 11 | Marcus D. Hartmann        | Germany     | Max Planck, Tübingen          | T1083, T1084, T1087        |
| 12 | Christopher S. Hayes      | USA         | U California, Santa Barbara   | H1065, T1065s2,<br>T1065s1 |
| 13 | Tatjana Heidebrecht       | Netherlands | Cancer Institute              | T1068                      |
| 14 | Andrzej Joachimiak        | USA         | U of Chicago                  | H1065, T1065s2,<br>T1065s1 |
| 15 | Youngchang Kim            | USA         | U of Chicago                  | H1065, T1065s2,<br>T1065s1 |
| 16 | Romain Linares            | France      | IBS, Grenoble                 | H1060 and T1061            |
| 17 | Andrew L. Lovering        | UK          | U of Birmingham               | T1074                      |
| 18 | Vladimir V. Lunin         | USA         | NREL                          | T1057                      |
| 19 | Andrei N. Lupas           | Germany     | Max Planck, Tübingen          | T1083, T1084, T1087        |
| 20 | Cihan Makbul              | Germany     | Julius-Maximilians U Würzburg | T1099                      |
| 21 | Karolina Michalska        | USA         | U of Chicago                  | H1065, T1065s2,<br>T1065s1 |
| 22 | Prasun K. Mukherjee       | India       | BARC                          | T1078                      |
| 23 | William (Sam) Nutt        | USA         | U of Chicago                  | H1065, T1065s2,<br>T1065s1 |
| 24 | Stefan L. Oliver          | USA         | Stanford U                    | H1036 and T1036            |
| 25 | Anastassis Perrakis       | Netherlands | Cancer Institute              | T1068                      |
| 26 | Lucy Stols                | USA         | U of Chicago                  | H1065, T1065s2,<br>T1065s1 |
| 27 | John A. Tainer            | USA         | U of Texas                    | T1101                      |
| 28 | Susan E. Tsutakawa        | USA         | LBL                           | T1101                      |
| 29 | Mauricio Valdivia-Delgado | UK          | U of Birmingham               | T1074                      |

**TABLE S2.** Best templates for the described targets

| Target   | Best template | Coverage, % | Sequence identity, % |
|----------|---------------|-------------|----------------------|
| T1036s1  | 6esc_A        | 97.77       | 61.58                |
| T1060s2  | 5ngj_A        | 74.41       | 5.88                 |
| T1060s3  | 6v8i_BK       | 72.36       | 17.98                |
| T1061-D1 | 1pdj_D        | 54.09       | 8.76                 |
| T1061-D2 | 2yc2_B        | 25.09       | 10.29                |
| T1061-D3 | 6bx4_D        | 76.7        | 17.72                |
| T1065s1  | 3hi2_D        | 54.62       | 9.23                 |
| T1065s2  | 5l0c_D        | 67.35       | 16.67                |
| T1054    | 4qo6_A        | 51.75       | 20.27                |
| T1057    | 2dpm_A        | 86.4        | 30.56                |
| T1068    | 2xse_A        | 59.22       | 23.58                |
| T1074    | 3wjc_A        | 67.42       | 8.99                 |
| T1078    | 3v0r_A        | 71.32       | 9.78                 |
| T1083    | 6grj_D        | 91.3        | 11.9                 |
| T1084    | 1afr_E        | 95.77       | 11.76                |
| T1087    | 5vju_A        | 92.47       | 17.44                |
| T1099    | 5gmz_B        | 56.91       | 26.17                |
| T1101-D1 | 2ann_A        | 84.34       | 27.14                |
| T1101-D2 | 1vdx_A        | 74.77       | 17.5                 |
